# Supplementary material
Source: MDPI journal article supplement (https://www.mdpi.com/2075-163X/12/8/990)
Supplement: s1 [file s1]

# Modes of Occurrence of Critical Metal Elements (Li, REEs and Other Critical Elements) in Low-Grade Bauxite from Southern Shanxi Province, China

Table S1. Major (wt.%) and trace element (µg/g) content of Low-Grade bauxite with different particle sizes and density grades.

| Sample  | SiO <sub>2</sub> | Al <sub>2</sub> O <sub>3</sub> | TFe <sub>2</sub> O <sub>3</sub> | MgO           | CaO           | Na <sub>2</sub> O | K <sub>2</sub> O | TiO <sub>2</sub> | S             | P     | Li   | Ga   | Sc    | V    | Cr   | Co   | Ni   | Rb   | Cs   |
|---------|------------------|--------------------------------|---------------------------------|---------------|---------------|-------------------|------------------|------------------|---------------|-------|------|------|-------|------|------|------|------|------|------|
|         | 0.01<br>wt. %    | 0.01<br>wt. %                  | 0.01<br>wt. %                   | 0.01<br>wt. % | 0.01<br>wt. % | 0.01<br>wt. %     | 0.01<br>wt. %    | 0.01<br>wt. %    | 0.01<br>wt. % | 0.01  | 0.2  | 0.05 | 0.1   | 1    | 1    | 0.1  | 0.2  | 0.1  | 0.05 |
| Y1      | 17.16            | 40.23                          | 0.28                            | 0.31          | 0.12          | 0.05              | 0.09             | 2.58             | 0.44          | 2190  | 4140 | 39.9 | 43.3  | 195  | 91   | 1.8  | 22.4 | 2.4  | 0.85 |
| L1      | —                | 30.32                          | 0.36                            | 0.30          | 0.17          | 0.04              | 0.07             | 2.47             | 0.31          | 3170  | 5950 | 40.8 | 37.1  | 231  | 93   | 1.1  | 32.3 | 1.5  | 0.95 |
| L0.5    | —                | 26.35                          | 0.31                            | 0.28          | 0.17          | 0.03              | 0.07             | 2.43             | 0.38          | 3030  | 4990 | 37.1 | 36.4  | 206  | 84   | 1.5  | 23.9 | 1.7  | 0.86 |
| L0.25   | —                | 25.12                          | 0.31                            | 0.28          | 0.17          | 0.04              | 0.07             | 2.47             | 0.41          | 3010  | 4750 | 36.3 | 38.2  | 199  | 82   | 2.2  | 23.9 | 2.4  | 0.85 |
| L0.125  | —                | 25.50                          | 0.34                            | 0.30          | 0.18          | 0.04              | 0.07             | 2.47             | 0.41          | 3050  | 4750 | 38.1 | 37.5  | 201  | 84   | 0.9  | 22.1 | 1.5  | 0.78 |
| L0.074  | —                | 23.04                          | 0.43                            | 0.28          | 0.18          | 0.04              | 0.06             | 2.36             | 0.41          | 2800  | 4350 | 33.5 | 35.4  | 190  | 79   | 1.7  | 23   | 1.5  | 0.72 |
| L0.044  | —                | 19.55                          | 0.60                            | 0.23          | 0.17          | 0.03              | 0.07             | 1.92             | 0.55          | 2150  | 3550 | 27.8 | 33.1  | 171  | 74   | 7.4  | 22.1 | 1.6  | 0.57 |
| F1-1    | —                | 8.05                           | 0.16                            | 0.10          | 0.15          | 0.01              | 0.04             | 0.52             | 0.47          | 600   | 1350 | 9.97 | 11.5  | 70   | 26   | 2.9  | 10.8 | 1.4  | 0.28 |
| F1-2    | —                | 28.81                          | 0.36                            | 0.30          | 0.17          | 0.04              | 0.07             | 2.58             | 0.35          | 3460  | 5810 | 39.4 | 37.7  | 221  | 92   | 1    | 25.6 | 1.5  | 0.93 |
| F1-3    | —                | 32.49                          | 0.34                            | 0.25          | 0.14          | 0.03              | 0.07             | 2.20             | 0.14          | 2450  | 6100 | 45.7 | 30.0  | 256  | 92   | 1    | 24.3 | 0.9  | 0.87 |
| F0.5-1  | —                | 3.87                           | 0.04                            | 0.05          | 0.15          | 0.01              | 0.01             | 0.18             | 0.51          | 160   | 560  | 4.22 | 6.1   | 38   | 13   | 0.7  | 6.9  | 0.6  | 0.1  |
| F0.5-2  | —                | 27.58                          | 0.34                            | 0.32          | 0.18          | 0.04              | 0.07             | 2.74             | 0.43          | 3570  | 5210 | 38.8 | 41.0  | 210  | 90   | 1.3  | 24.3 | 2.2  | 0.91 |
| F0.5-3  | —                | 33.91                          | 0.34                            | 0.25          | 0.14          | 0.03              | 0.07             | 2.21             | 0.15          | 2360  | 5980 | 50.7 | 31.8  | 258  | 91   | 1.1  | 25.9 | 1    | 0.89 |
| F0.25-1 | —                | 5.40                           | 0.07                            | 0.07          | 0.15          | 0.01              | 0.02             | 0.41             | 0.59          | 300   | 910  | 6.36 | 11.8  | 62   | 26   | 1    | 9.8  | 0.7  | 0.16 |
| F0.25-2 | —                | 26.07                          | 0.33                            | 0.32          | 0.18          | 0.04              | 0.07             | 2.71             | 0.45          | 3410  | 4880 | 38.1 | 41.8  | 208  | 88   | 2    | 24.3 | 2.2  | 0.88 |
| F0.25-3 | —                | 33.43                          | 0.36                            | 0.25          | 0.13          | 0.03              | 0.07             | 2.17             | 0.35          | 2420  | 6430 | 47.9 | 30.4  | 254  | 90   | 1.3  | 25.6 | 0.9  | 0.87 |
| Sample  | Nb               | Ta                             | Ba                              | Sr            | Th            | U                 | La               | Ce               | Pr            | Nd    | Sm   | Eu   | Gd    | Tb   | Dy   | Y    | Ho   | Er   | Tm   |
|         | 0.1              | 0.05                           | 10                              | 0.2           | 0.01          | 0.1               | 0.5              | 0.01             | 0.03          | 0.1   | 0.03 | 0.03 | 0.05  | 0.01 | 0.05 | 0.1  | 0.01 | 0.03 | 0.01 |
| Y1      | 52.9             | 3.85                           | 40                              | 2690          | 50.0          | 27.1              | 211              | 700.00           | 46.3          | 172.0 | 27.8 | 3.92 | 11.65 | 1.40 | 7.86 | 41.4 | 1.57 | 4.87 | 0.82 |
| L1      | 44.8             | 3.33                           | 40                              | 4370          | 49.5          | 19.4              | 186.0            | 790.00           | 57.5          | 237   | 43.5 | 5.90 | 15.40 | 1.45 | 6.80 | 31.5 | 1.28 | 3.91 | 0.64 |
| L0.5    | 44.7             | 3.41                           | 40                              | 4130          | 55.4          | 21.8              | 194.5            | 810.00           | 58.1          | 240   | 44.0 | 6.04 | 15.95 | 1.51 | 7.24 | 34.5 | 1.39 | 4.15 | 0.69 |

|         |         |      |      |       |       |      |       |         |       |       |      |      |       |      |       |      |      |      |      |
|---------|---------|------|------|-------|-------|------|-------|---------|-------|-------|------|------|-------|------|-------|------|------|------|------|
| L0.25   | 47.1    | 3.45 | 40   | 4070  | 59.6  | 25.1 | 221   | 900.00  | 64.5  | 263   | 45.8 | 6.27 | 17.05 | 1.61 | 7.71  | 37.9 | 1.47 | 4.39 | 0.73 |
| L0.125  | 47.4    | 3.51 | 40   | 4120  | 55.6  | 22.4 | 199.5 | 820.00  | 60.4  | 249   | 43.7 | 5.96 | 15.40 | 1.50 | 7.51  | 35.9 | 1.44 | 4.29 | 0.71 |
| L0.074  | 44.4    | 3.31 | 40   | 3780  | 52.7  | 22.5 | 189.5 | 770.00  | 55.0  | 227   | 41.5 | 5.55 | 14.95 | 1.47 | 7.10  | 35.2 | 1.37 | 4.12 | 0.69 |
| L0.044  | 34.7    | 2.66 | 40   | 2830  | 47.0  | 20.2 | 154.0 | 630.00  | 43.7  | 178.5 | 32.4 | 4.49 | 12.85 | 1.33 | 6.63  | 32.9 | 1.29 | 3.84 | 0.63 |
| F1-1    | 9.3     | 1.09 | 20   | 702   | 13.65 | 5.9  | 43.9  | 170.5   | 12.30 | 50.1  | 8.66 | 1.19 | 3.56  | 0.39 | 2.14  | 11.4 | 0.42 | 1.26 | 0.20 |
| F1-2    | 46.7    | 3.56 | 40   | 4790  | 51.9  | 19.0 | 185.0 | 800.00  | 59.9  | 249   | 45.5 | 6.17 | 15.95 | 1.50 | 7.11  | 32.4 | 1.34 | 4.03 | 0.68 |
| F1-3    | 40.2    | 2.82 | 30   | 3020  | 23.6  | 12.0 | 76.1  | 343     | 24.7  | 105.5 | 20.5 | 2.89 | 7.95  | 0.79 | 3.82  | 15.4 | 0.74 | 2.33 | 0.41 |
| F0.5-1  | 2.9     | 0.25 | 10   | 197.0 | 9.47  | 2.5  | 15.8  | 56.9    | 4.20  | 16.4  | 2.89 | 0.39 | 1.58  | 0.21 | 1.21  | 6.9  | 0.24 | 0.70 | 0.10 |
| F0.5-2  | 51.2    | 3.92 | 40   | 4890  | 69.3  | 27.2 | 250   | 1030.00 | 73.8  | 302   | 54.2 | 7.34 | 18.45 | 1.78 | 8.51  | 41.4 | 1.60 | 4.79 | 0.80 |
| F0.5-3  | 40.9    | 2.84 | 30   | 3000  | 26.6  | 12.7 | 95.9  | 420     | 30.0  | 127.5 | 24.2 | 3.30 | 8.94  | 0.87 | 4.22  | 17.5 | 0.81 | 2.49 | 0.43 |
| F0.25-1 | 6.6     | 0.46 | 10   | 375   | 18.35 | 5.1  | 31.9  | 109.5   | 8.53  | 33.6  | 5.84 | 0.78 | 3.17  | 0.43 | 2.52  | 13.3 | 0.49 | 1.40 | 0.22 |
| F0.25-2 | 52.3    | 3.92 | 40   | 4710  | 69.1  | 28.9 | 250   | 1010.00 | 73.1  | 298   | 53.5 | 7.07 | 18.55 | 1.78 | 8.59  | 43.3 | 1.64 | 4.89 | 0.82 |
| F0.25-3 | 41.5    | 2.76 | 30   | 2970  | 24.7  | 11.8 | 85.1  | 389     | 27.5  | 116.0 | 22.3 | 3.03 | 8.25  | 0.79 | 3.84  | 16.0 | 0.75 | 2.31 | 0.40 |
| sample  | REE     | Tl   | Pb   | Bi    | Be    | Cu   | Zn    | As      | Mo    | Cd    | Ag   | Ge   | In    | Mo   | Re    | Sb   | Se   | Te   | Sn   |
|         |         | 0.02 | 0.5  | 0.01  | 0.05  | 0.2  | 2     | 0.2     | 0.05  | 0.02  | 0.01 | 0.05 | 0.005 | 0.05 | 0.002 | 0.05 | 1    | 0.05 | 0.2  |
| Y1      | 1195.71 | 0.13 | 54.0 | 2.04  | 4.15  | 12.5 | 4     | 3.8     | 5.19  | <0.02 | 0.44 | 0.40 | 0.328 | 5.19 | 0.023 | 2.25 | 10   | 1.05 | 31.3 |
| L1      | 1354.48 | 0.09 | 41.1 | 1.75  | 5.77  | 5.5  | 4     | 2.4     | 5.28  | <0.02 | 0.15 | 0.54 | 0.260 | 5.28 | 0.014 | 1.50 | 6    | 0.86 | 35.6 |
| L0.5    | 1389.06 | 0.10 | 39.4 | 1.87  | 5.03  | 9.0  | 5     | 2.9     | 5.27  | <0.02 | 0.29 | 0.56 | 0.288 | 5.27 | 0.018 | 1.60 | 7    | 0.85 | 34.7 |
| L0.25   | 1539.25 | 0.10 | 39.2 | 1.89  | 4.72  | 13.8 | 8     | 2.5     | 5.40  | 0.05  | 0.33 | 0.59 | 0.330 | 5.40 | 0.019 | 1.69 | 8    | 0.93 | 35.7 |
| L0.125  | 1415.07 | 0.08 | 40.7 | 1.90  | 4.68  | 12.7 | 40    | 3.1     | 5.58  | 0.04  | 0.21 | 0.54 | 0.329 | 5.58 | 0.021 | 1.91 | 7    | 0.88 | 36.0 |
| L0.074  | 1323.66 | 0.09 | 42.1 | 1.81  | 4.44  | 20.0 | 63    | 4.4     | 7.20  | <0.02 | 0.22 | 0.50 | 0.358 | 7.20 | 0.019 | 3.32 | 7    | 0.84 | 37.3 |

|         |         |      |      |      |      |      |    |      |      |       |      |      |       |      |       |      |   |      |      |
|---------|---------|------|------|------|------|------|----|------|------|-------|------|------|-------|------|-------|------|---|------|------|
| L0.044  | 1074.55 | 0.11 | 38.0 | 1.64 | 3.28 | 48.1 | 74 | 3.7  | 7.55 | 0.08  | 0.62 | 0.43 | 0.430 | 7.55 | 0.022 | 2.43 | 8 | 0.72 | 34.0 |
| F1-1    | 296.13  | 0.06 | 29.9 | 0.60 | 1.38 | 22.7 | 40 | 0.3  | 1.78 | <0.02 | 0.14 | 0.18 | 0.138 | 1.78 | 0.009 | 0.55 | 3 | 0.26 | 40.2 |
| F1-2    | 1381.54 | 0.09 | 41.6 | 1.84 | 5.84 | 5.2  | 5  | 2.5  | 5.62 | <0.02 | 0.21 | 0.58 | 0.286 | 5.62 | 0.016 | 1.68 | 6 | 0.93 | 34.6 |
| F1-3    | 592.01  | 0.05 | 34.1 | 1.31 | 5.19 | 1.3  | 4  | 2.4  | 4.08 | <0.02 | 0.10 | 0.34 | 0.163 | 4.08 | 0.006 | 1.05 | 4 | 0.67 | 34.1 |
| F0.5-1  | 101.40  | 0.05 | 4.0  | 0.28 | 0.73 | 21.8 | 33 | <0.2 | 1.12 | <0.02 | 0.09 | 0.10 | 0.091 | 1.12 | 0.007 | 0.15 | 2 | 0.20 | 9.8  |
| F0.5-2  | 1759.59 | 0.11 | 43.6 | 2.08 | 5.39 | 8.2  | 6  | 3.3  | 5.93 | <0.02 | 0.29 | 0.66 | 0.330 | 5.93 | 0.020 | 1.89 | 7 | 1.00 | 39.2 |
| F0.5-3  | 722.11  | 0.05 | 30.4 | 1.29 | 5.26 | 2.0  | 5  | 2.0  | 4.06 | <0.02 | 0.13 | 0.36 | 0.163 | 4.06 | 0.006 | 1.04 | 4 | 0.68 | 31.4 |
| F0.25-1 | 199.99  | 0.07 | 6.1  | 0.40 | 0.93 | 35.7 | 24 | 0.4  | 1.59 | <0.02 | 0.13 | 0.14 | 0.221 | 1.59 | 0.016 | 0.31 | 2 | 0.23 | 13.2 |
| F0.25-2 | 1734.43 | 0.11 | 44.0 | 2.13 | 5.32 | 10.9 | 7  | 3.3  | 6.04 | <0.02 | 0.35 | 0.69 | 0.360 | 6.04 | 0.022 | 1.98 | 7 | 0.96 | 40.3 |
| F0.25-3 | 662.46  | 0.05 | 31.4 | 1.29 | 5.57 | 2.7  | 3  | 2.3  | 4.09 | 0.02  | 0.09 | 0.37 | 0.153 | 4.09 | 0.005 | 1.01 | 4 | 0.70 | 33.4 |

Note: The corresponding detection limits are shown below oxides and elements; REE represents lanthanide element (except Pm) .

**Table S2.** Energy spectrum data (atoms %) of SEM in figure 2 and 9.

| Image   | Mineral | C   | Al    | O     | Si    | Ti    | Zr    | S     | P    | K    | Mg   | Ga   | Fe    | Sr   | Ce   |
|---------|---------|-----|-------|-------|-------|-------|-------|-------|------|------|------|------|-------|------|------|
| Fig. 2e | A       | Dsp | 12.08 | 23.81 | 64.11 | —     | —     | —     | —    | —    | —    | —    | —     | —    | —    |
|         | B       | Kln | —     | 15.26 | 69.05 | 15.68 | —     | —     | —    | —    | —    | —    | —     | —    | —    |
|         | C       | Ckt | 27.50 | 10.70 | 53.78 | 8.03  | —     | —     | —    | —    | —    | —    | —     | —    | —    |
| Fig. 2f | D       | Ant | —     | —     | 72.43 | —     | 27.57 | —     | —    | —    | —    | —    | —     | —    | —    |
|         | E       | Kln | 15.48 | 10.76 | 62.61 | 11.14 | —     | —     | —    | —    | —    | —    | —     | —    | —    |
| Fig. 2g | F       | Ilt | 35.00 | 8.10  | 45.45 | 9.35  | —     | —     | —    | 1.38 | —    | —    | 0.71  | —    | —    |
| Fig. 2h | G       | Ant | —     | —     | 72.67 | —     | 27.33 | —     | —    | —    | —    | —    | —     | —    | —    |
|         | H       | Zrn | —     | —     | 66.67 | 16.71 | —     | 16.63 | —    | —    | —    | —    | —     | —    | —    |
| Fig. 8a | A       | Qz  | 48.98 | 2.82  | 25.39 | 22.81 | —     | —     | —    | —    | —    | —    | —     | —    | —    |
|         | B       | Ckt | 16.27 | 12.12 | 62.97 | 8.65  | —     | —     | —    | —    | —    | —    | —     | —    | —    |
| Fig. 8b | C       | Ckt | —     | 20.42 | 63.26 | 16.32 | —     | —     | —    | —    | —    | —    | —     | —    | —    |
|         | D       | Chm | —     | 13.84 | 57.93 | 8.94  | —     | —     | —    | —    | 3.99 | —    | 15.30 | —    | —    |
| Fig. 8c | E       | Goy | —     | 18.32 | 62.72 | 4.82  | —     | —     | 1.52 | 5.61 | —    | 4.23 | —     | 2.77 | —    |
|         | F       | Ckt | —     | 22.87 | 62.85 | 14.27 | —     | —     | —    | —    | —    | —    | —     | —    | —    |
| Fig. 8d | G       | Flo | 29.35 | 9.33  | 55.10 | 5.20  | —     | —     | —    | 0.93 | —    | —    | —     | —    | 0.09 |

| Image   |   | Mineral | C     | Al    | O     | Si    | Ti | Zr | S    | P    | K | Mg | Ga | Fe | Sr   | Ce   |
|---------|---|---------|-------|-------|-------|-------|----|----|------|------|---|----|----|----|------|------|
| Fig. 8e | H | Ckt     | —     | 21.55 | 63.07 | 15.37 | —  | —  | —    | —    | — | —  | —  | —  | —    | —    |
|         | I | Kln     | —     | 17.83 | 63.65 | 18.45 | —  | —  | —    | —    | — | —  | —  | —  | —    | —    |
| Fig. 8f | J | Goy     | 18.55 | 11.11 | 62.39 | —     | —  | —  | 0.91 | 4.32 | — | —  | —  | —  | 2.46 | 0.27 |

Note: Dsp: Diaspore; Kln: Kaolinite; Ckt: Cookeite; Ant: Anatase; Ill: Illite; Zrn: Zircon; Qz: Quartz; Chm: Chamosite; Goy: Goyazite; Flo: Florencite.
